# Supplementary material for: Targeting CXCR4 potentiates anti-PD-1 efficacy modifying the tumor microenvironment and inhibiting neoplastic PD-1
Source: PubMed Central journal article supplement (PMC6819555; doi:10.1186/s13046-019-1420-8), 2019-10-28

# Supplementary Figure 1

## Scheme of treatment

A

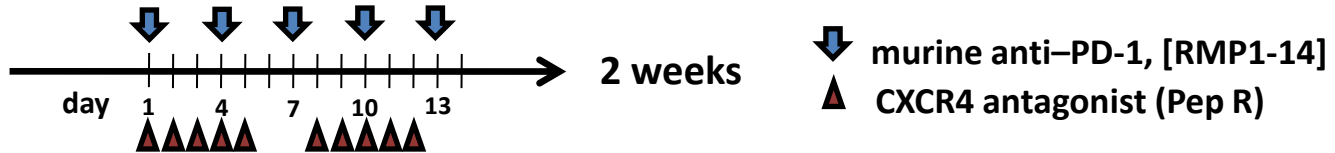

B

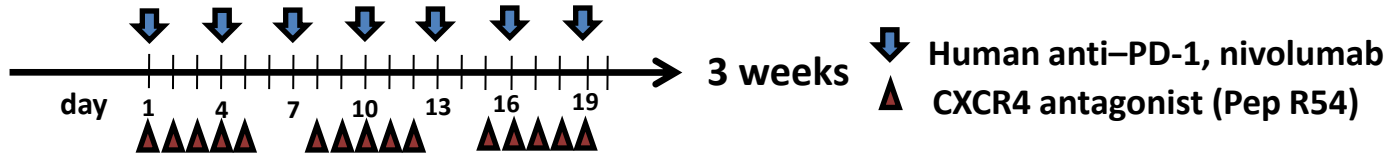

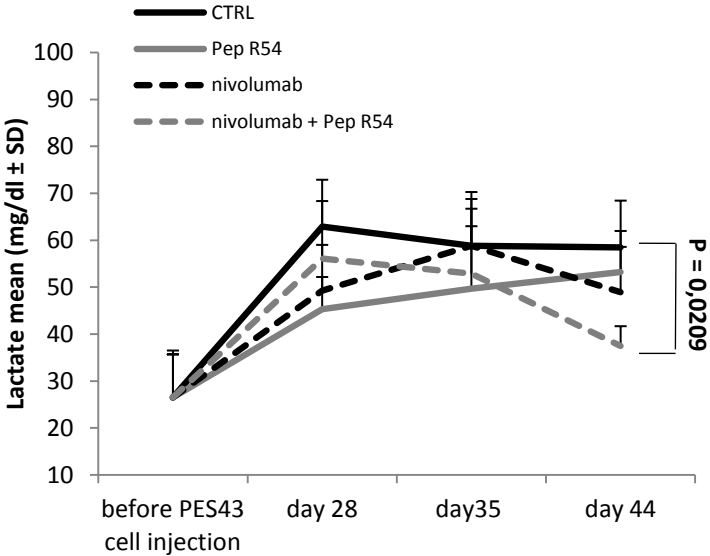

A

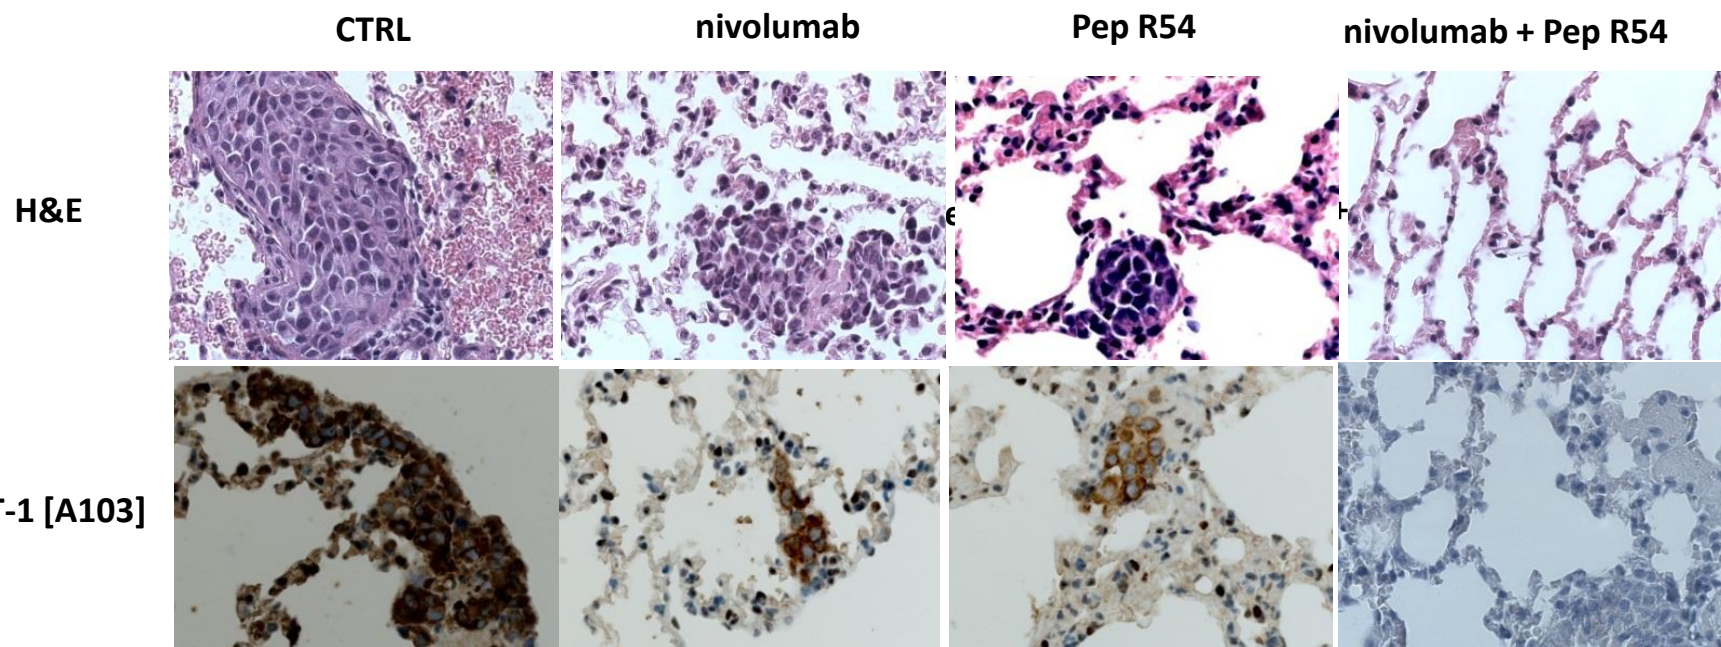

B

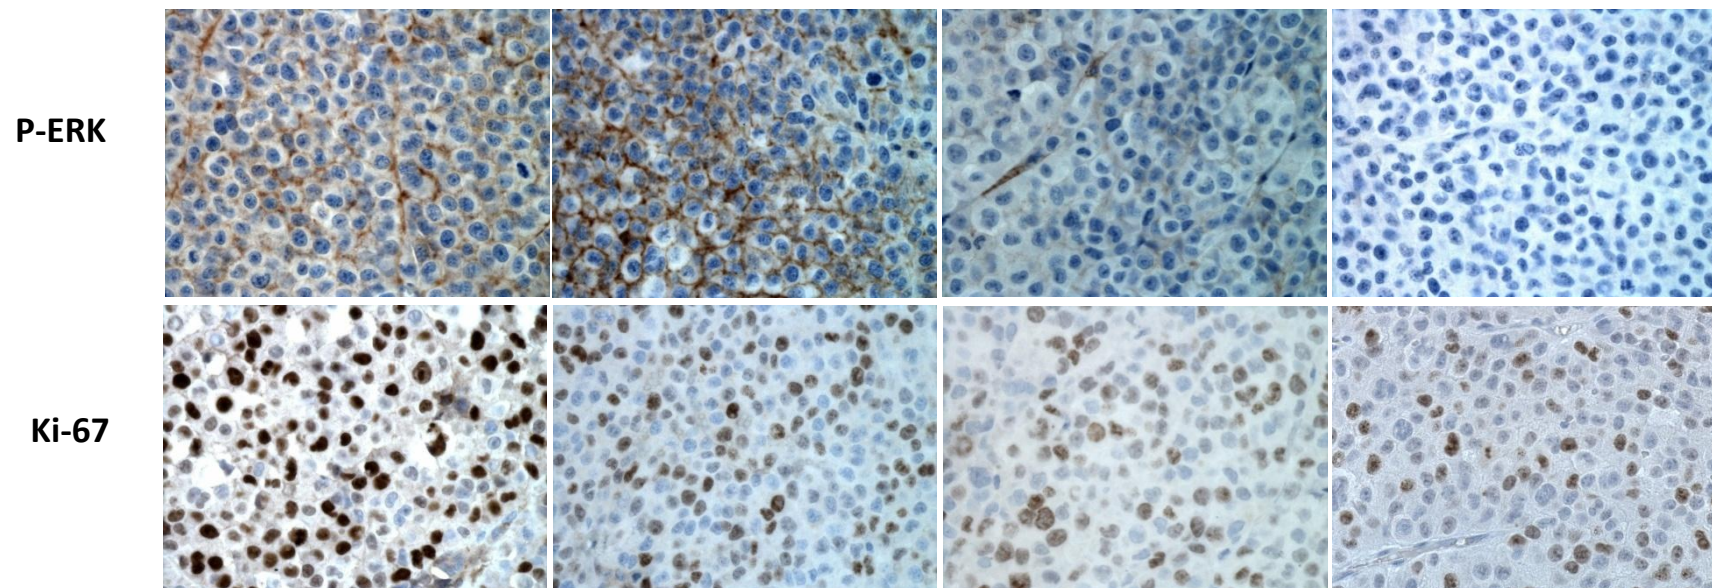

Supplement: 13046_2019_1420_MOESM1_ESM.pdf [file 13046_2019_1420_MOESM1_ESM.pdf]
